# Supplementary material for: Identification of hub genes and pathophysiological mechanism related to acute unilateral vestibulopathy by integrated bioinformatics analysis
Source: Front Neurol. 2022 Sep 27;13:987076. doi: 10.3389/fneur.2022.987076 (PMC9552803; doi:10.3389/fneur.2022.987076)
Supplement: Supplementary file 4 [file Data_Sheet_2.XLSX]

## Sheet: up-regulated
DEGs	Modules	Common genes
TMEM176B	MSRB1	ELMO2
SLCO4C1	ELMO2	SLMAP
ODF2L	SLMAP	ERGIC1
IL18R1	TMEM216	GLT1D1
APMAP	ZEB1	P2RY13
KIF27	SOD2	MGAM
CLEC4D	CYTH1	MOB3A
SLC2A3	OSBPL8	NBN
MMP9	SORL1	KLHL2
GRAMD1C	RPS6KA5	IVNS1ABP
NSUN7	BRCA1	JPT1
MMP8	GTPBP1	TBC1D14
MGAM	BUD31	RAP1A
GSTM4	CHST15	MAN1A1
KLRC3	SEC14L1	LILRB2
IL1R2	NME8	TMEM45B
TIAM2	RICTOR	PACSIN2
HSDL2	LINC01270	ZEB1
ANPEP	KDM4B	CLEC4D
ASPH	LILRA6	TMCC3
NQO2	ASAH1	NLRC4
CYP4F3	BST1	TMX4
PTPN12	UBE2W	MYD88
MKNK1	HK3	ADGRE5
SLC2A14	DLEC1	FGR
RGS18	CYSTM1	HEATR5A
IRAK3	UIMC1	KCNE1
CDKL5	NFYC	PPP1R12B
MCTP2	EXOC1	SPATA5L1
CLEC12A	CPD	AQP9
DTHD1	CNTNAP3B	SLC37A3
IRS2	SUSD6	OSBPL8
ACSL1	SECTM1	THOC5
PGD	IFNAR1	SLC2A14
PLBD1	RAB11FIP4	SRPK1
ELAPOR1	NCF1	ATP6V1B2
ANO10	TLR5	PLCG2
FKBP5	KIAA0232	XPO6
CST7	BTBD10	ALOX5
PYGL	ARHGAP26	LY75-CD302
CEP78	PHF12	UBA1
KLRD1	MAP2K4	CR1L
CDK19	WSB1	RPS6KA5
ACP3	AHCTF1	UBN1
IL18RAP	MME	PTPN12
SLC11A1	MACIR	BASP1
IQGAP2	MFSD14B	PFKFB2
RNASE1	KIF1B	LIPN
BMX	RESF1	C5AR1
ENTPD1	LRRFIP1	CYRIA
CR1	CR1	TBK1
SULT1B1	DAAM2	TRIQK
TNFRSF9	NDUFB3	GOLGB1
PROK2	FPR1	SNX16
PTGDR	GRAMD1C	PYGL
ALPL	MAN1A1	WDFY3
KCNE1	ABHD5	TRPM6
FBXO38	HEATR5A	SNX27
ARG1	CR1L	CD55
GPR141	UBN1	PROK2
BCL6	PFKFB2	CSGALNACT2
DNAJC3	CYRIA	PLXDC2
GPCPD1	WDFY3	RNF103-CHMP3
KLHL2	ALOX5AP	TMCO3
TREML2	PADI4	ADGRG3
S100P	MDM2	PPP3CA
ADGRE3	GBE1	YIPF4
CPD	PSD4	TAGLN2
ROCK1	STAT5B	ADGRE3
CD58	G6PD	MKNK1
HRH2	C5AR2	DYSF
TRIOBP	SNX11	GBE1
ARID4A	SCLT1	TNFRSF9
C3AR1	ACSL1	CYP4F2
MOSPD2	ABCC5	SPTLC2
GCA	LILRA1	RBPJ
KIR2DS5	NRDC	IL1R2
TMEM45B	SLC24A4	SLC49A4
CX3CR1	RNPEP	TIAM2
MAPK14	ATP2B4	CYRIB
FPR2	ADAR	MOSPD2
B4GALT5	P2RX1	SERPINB1
AOAH	NUMB	HSPBAP1
OLFM1	ITGAX	SLC15A4
ACTN1	XRN1	IQGAP1
PLA2G4A	IRF2	DGLUCY
ERI1	ZFYVE16	RTN3
MANSC1	MED31	GNAQ
LCP1	SLC7A7	SLC2A3
LIPN	ICAM3	RNF144B
NFIL3	TBC1D15	PDZD8
ADGRG3	MBP	ACOX1
NIBAN1	LRG1	STAT5B
ZNF33A	BLZF1	MYH9
TBXAS1	MBOAT7	NCF2
IVNS1ABP	NLRP12	ARFIP1
TNFSF14	TLE4	G6PD
SRPK1	SEC61A2	OS9
PRF1	TREM1	SOS2
FAR1	BBIP1	SPOPL
FBXL5	LONRF1	GPCPD1
PDK3	PDK3	KLHL8
SLC37A3	CASP4	ANKRD28
RGS9	SFXN5	FAR1
BASP1	LY96	SRP54
GMCL1	IL1R1	CDC42EP3
EPS15	ABTB1	MICU1
TPR	SAT1	RBM47
NDEL1	RFX2	DGAT2
HIPK3	LBR	ACSL1
PFKFB3	ERGIC1	ARMH2
PPP4R1	HIVEP1	PLBD1
CLEC12B	SPATA5L1	APMAP
ADGRE2	THOC5	KIF27
RUBCNL	STAG2	LRRK2
PPP2R5A	ARL11	APLP2
BTBD10	CD55	LILRA1
FAM126B	ADGRG3	ELMO1
MAP2K4	ATP6V0B	NRDC
PADI2	TIPARP	ARSG
TMCO3	RTN3	TRIOBP
VIM	GNG10	RBM5
CSGALNACT2	GPCPD1	NFIL3
MAP3K2	ANKRD28	GCA
PLXNC1	CXCR2	RNPEP
RPS6KA1	DHRS13	RHOA
CD14	SERPINA1	GRN
MSN	CYP4F3	NQO2
DYSF	CD58	ELF2
GAS7	FAR2	PTS
UBA1	FLOT2	SERPINA1
MTARC1	UBR5	ATP2B4
ERLIN1	ZNF20	PJA2
ANKRD13A	MAPK14	NIBAN1
SMAP2	CAMKK1	ANPEP
APLP2	AKAP10	PLXNC1
CFLAR	TLR8	AGTPBP1
PTPRJ	HLA-A	CYP4F3
NLRC4	TPCN2	PTPN6
G6PD	ST3GAL6	ASAH1
KIF1B	MPZL1	PADI2
CR1L	GPR141	P2RX1
MACIR	TSPAN16	ERLIN1
ENPP5	DNAAF11	RNF24
OSTF1	SIPA1L1	CD58
FGFBP2	WAS	NUMB
PPP1R12B	HSPA1A	MCEMP1
P2RY13	DAPK2	DNAJC3
ZBTB7B	DNAJB6	ST3GAL4
TBK1	PPT1	RIT1
STAG1	NUP50	RAB21
ALOX5	S100A8	MLF2
NUMB	ARRDC4	ITGAX
C9orf72	CPQ	NABP1
IRAK4	TCAIM	FAM126B
DGAT2	IFRD1	ACP3
MYD88	ZNF267	ATP6V1C1
MFSD1	HEBP2	ZFYVE16
SMURF2	HMGB2	SUPT20H
MICU2	VPS8	CLEC12A
RIT1	RGS2	ARID4A
UBR2	MGAM	JADE1
TGFBR3	MOB3A	AGO4
MCEMP1	IVNS1ABP	ASPH
IFNAR1	TUBA4A	ECE1
SRP54	SLU7	MSRA
FLOT1	B3GNT8	HCK
CSNK1D	VPS37C	DDX59
QPCT	ATP6V1B2	ZNF106
RNPEP	PLCG2	UBR5
MAN1A1	H3C13	EXOC1
CRISPLD2	PYGL	ZNF587
GSTM1	SNX27	PTTG2
ST3GAL4	SERPINB1	VMP1
CHMP3	IQGAP1	CARD6
CORO1C	TBC1D1	STEAP4
TXNRD1	TP53INP1	ICAM3
LY75-CD302	RNF144B	MAPK14
HSPA1A	OS9	ACVR1B
HNRNPH2	ABHD3	HRH2
CASTOR3	IQSEC1	RALGAPA2
ZFY	PLBD1	CAMKK1
WASHC5	TRIM38	RAPGEF2
GLT1D1	TMCC1	ENTPD1
NT5C2	DNTTIP1	SVIL
RALGAPA2	SPRY3	RAF1
RNF149	RIT1	ANKRD13A
KLHL8	C18orf25	NT5C2
KIAA0753	ACVR1B	ZNF281
TAOK3	IFNGR1	SLA
PAPOLA	ST6GALNAC2	GAS7
ST6GALNAC3	ORAI2	CYBC1
RELL1	GAS7	HERC4
ECE1	HERC4	RELL1
AQP9	OGA	SIRPB1
WASHC4	C7orf25	RPS6KA1
ASNSD1	UGP2	ATXN1
RAB19	PPM1F	VIM
SLC15A4	ORM2	CPD
GZMH	GPX3	APH1B
SLMAP	CASTOR3	TLR8
ATRX	ERN1	ADAM17
ERN1	MTMR3	XRCC4
GNAQ	PGD	F5
XRCC4	STXBP3	CDK19
AGTPBP1	SCN9A	FLOT1
SIRPB1	ZNF200	CYB5R4
TK2	PIGX	PRKAR1A
FOLR3	APOL2	EGLN1
TMX4	ITPK1	LCP1
TMCC3	C16orf54	CFLAR
STAT5B	MINDY1	QSOX1
F5	OAZ2	SPAG9
JADE1	FRY	STAM2
KCTD10	APOBR	PTPRJ
SLCO1C1	TLR1	FPR2
RBPJ	TMCO3	SPATA6
PLXDC2	CLEC4E	GPR141
PHTF1	RBPJ	EPS15
ATXN1	ALDH2	TBXAS1
EPS15L1	CYRIB	MXD1
RB1CC1	KATNIP	RNF149
GPR65	DGLUCY	IFNAR1
CCDC186	SH2B2	SEMA4A
CARD6	SBNO2	SLC9A8
IQGAP1	EFHC1	ARG1
HOOK3	MICU1	MANSC1
CYRIB	GMFG	ELAPOR1
NBN	ZBTB18	IRAK3
TBC1D14	PJA2	KIAA0753
RESF1	AGTRAP	FBXO38
ACER3	TMEM140	ANO10
CMKLR1	USP4	MTARC1
PTS	CEBPD	UBR2
MSRA	ZFP36	LPCAT3
CDC73	PXN	CDKL5
ASAH1	SGK1	NSUN7
ANXA1	TUBA1A	NOTCH2
ARMH2	CYB5R4	BMX
GMFB	TRAPPC2	PRKDC
LPCAT1	ATG7	CD93
CAP1	EPS15	WAS
PHF12	PTGS2	HSPA1A
SEMA4A	CNOT7	FKBP5
RBM47	DPY19L3	PFKFB3
ATP6V1C1	KAT8	TLE4
PLEK	ROPN1L	ZBTB7B
GLYR1	DLEU2	CEMIP2
VCP	ADGRE2	CHMP3
TNKS	TNFRSF10C	IRS2
SPATA6	TRANK1	BTBD10
PPP3CA	HIPK3	CLEC12B
PPT1	SLC19A1	UBXN2B
ZDHHC13	DERL2	TREM1
ZFC3H1	DOCK4	CASTOR3
RAB31	TXNDC12	CSNK1D
ZNF106	TSPAN2	ADGRE2
ZNF148	RGS18	HNRNPH2
DDX59	IRF2BPL	ARHGAP26
MLF2	SPAST	FBXL5
EXOC1	ARMC2	ACTN1
STEAP4	PIGB	HSDL2
SLFN13	CYTH4	PHF12
CLIP1	C3orf62	CIR1
PJA2	COL9A3	MAP2K4
CCL3	FCGRT	HIPK3
RNF103-CHMP3	RSPH14	BCL6
VMP1	LILRB3	EPS15L1
ITGAX	SPI1	STAT6
RPS6KA5	LYVE1	ARHGAP19
ANKRD34B	BAZ2B	PDK3
STAT6	MARK2	B4GALT5
SOS2	TMEM91	IL18R1
CAMKK1	PHAF1	RTF2
RAPGEF2	SRP54	QPCT
PTPN22	TUBA1C	KAT6A
ACVR1B	KIF27	TXNDC12
VPS8	GTF2B	ERN1
GOLIM4	SLC43A2	MCTP2
CEP192	RNF24	KCNJ15
MFN2	OSBPL9	PPT1
GK5	IL1RN	RP2
BAZ1A	DDX59	TNFSF14
CYRIA	C18orf32	AOAH
RAB7A	ANKRD13A	CRISPLD2
TPM3	ATXN1	MACIR
WDFY3	APH1B	SULT1B1
CCDC126	F5	SIRPD
STAM2	LCP1	PLAUR
PFKFB2	IMPDH1	PGD
CDC42EP3	FBXO38	RAB31
RTN3	IGF2R	GPR160
TRAPPC8	FCER1G	ZNF33A
PDGFD	TPST1	SMAP2
ADAM17	PFKFB4	RGS18
CNOT4	CLEC12B	SLC11A1
ARHGAP15	POLD3	RALB
GOLGB1	HSDL2	KIF1B
ZNF33B	ADNP2	IFRD1
PDZD8	PGS1	BCAS3
CAPZB	PLAUR	STXBP3
SDCBP	BCAS3	TDP2
RNF144B	PYCARD	FBXL13
CD93	ACSL4	ABTB1
RCHY1	ST20-MTHFS	RESF1
PCNX1	CKAP4	TREML2
XPO6	MCTP1	NDEL1
SPAST	PSMA3-AS1	ST6GALNAC3
ZFYVE16	WLS	LRRFIP1
STXBP3	NDUFB1	PPP4R1
PRKDC	NBN	GRAMD1A
KREMEN1	JPT1	PCNX1
UBLCP1	TBC1D14	ALPL
CLIP4	GK	VPS8
OSBPL8	RNF141	RUBCNL
AKAP9	PROK2	SPAST
LPCAT3	CSGALNACT2	CR1
P2RX1	MPP7	AVL9
HIF1A	AMN1	CFAP45
HERC4	CAPZA2	HCLS1
IDH1	MOSPD2	ZNF33B
KCNJ15	FNIP1	FPR1
UBXN2B	SLC2A3	MMP9
CORO1A	ACOX1	GRAMD1C
APH1B	TLR6	CD14
GPR160	CPSF7
ATP2B4	SIPA1L2
APC	NIBAN1
TRIQK	PLXNC1
GFOD1	RAB21
LGR6	FBXO33
IFRD1	AGO4
STRADA	STEAP4
USP38	RALGAPA2
RHOA	GMIP
TREM1	PPP1R3B
SPTLC2	SPATA6
IKBKB	STX11
FCRL6	TBXAS1
EXOC6	DRAM1
HCK	MEGF9
PDCD6IP	PFKFB3
ANKRD28	IL1RAP
SLC25A40	CSNK1D
CHD4	ARHGAP19
SPATA5L1	AMACR
ARPC2	CMTM6
CPNE3	RP2
RBL2	GAB2
CASP8	FUZ
HCLS1	GRAMD1A
NRDC	PCNX1
RTN4	LIMK2
OS9	VNN3P
GRAMD1A	STX3
SMARCA5	P2RY13
GBE1	MYD88
ATP6V1B2	PLXNA2
NKG7	SLC36A1
DOCK11	FLT3
PPP2R2B	VNN1
PACSIN2	DOK3
COPB2	DENND3
ABTB1	GNAQ
NOTCH2	NOTCH2NLA
VAMP3	TMEM71
TAGLN2	KLHL8
OSBPL2	SLC16A3
ARFIP1	CHIC2
BTBD9	APLP2
ME2	CTBS
TM9SF2	TMEM234
SPART	GRN
TMOD3	SLC45A4
ADGRE5	PTS
UBN1	ANPEP
VPS45	APOBEC3C
NCF2	ARID4A
CCDC149	H4C14
GLIPR2	CDH23
ALDOA	NEDD9
ARHGAP19	CDK19
SYNE1	NPTN
SYNE2	RNF149
UBR5	CSF2RA
IL12RB1	NUDT5
PPP1R12A	CEMIP2
CIR1	HNRNPH2
SLA	EPS15L1
USP34	EBLN2
ERGIC1	KDM3A
CYP4F2	ZNF33A
ARHGAP26	AMD1
THOC5	KIAA0825
HEATR5A	CFAP45
ARID4B	ITGA5
RAB21	MEFV
TASOR2	GLT1D1
ATL3	MSL1
PLAUR	SIRPB2
RBM12	TMX4
RALB	ERV3-1
HGSNAT	FGR
HSPBAP1	AQP9
PXK	ING3
TRPM6	SRPK1
ARPC5	UBA1
PHLDB2	NMNAT1
GTDC1	LIPN
FBXL13	C5AR1
KPNA1	TRIQK
FGR	SNX16
NABP1	ANXA3
ARL5A	TRPM6
ICA1	SLC8A1
QSOX1	RNF103-CHMP3
HIBCH	TNFRSF9
WAS	ORM1
ACTN4	F2RL1
ELOVL4	VIM-AS1
SNX16	CDC42EP3
CYB5R4	MTX1
LILRA1	DPYD
HSD17B11	PILRA
CFAP45	IL6R
ZNF75D	NFIL3
PTTG2	TM6SF1
TOPBP1	GCA
GZMB	NQO2
CERT1	AGTPBP1
KIN	VSIR
IGFBP7	ATP6V1C1
MAPK1	JADE1
ERP44	SKAP2
DHRS7	VMP1
VPREB1	HRH2
PHF3	SVIL
ZNF281	SLA
CYBC1	LXN
XRCC5	RELL1
SVIL	KLHL21
CCND3	PGLYRP1
SERPINB1	FBXL20
AVL9	LAMTOR3
TOP2B	HBP1
SLC49A4	HAUS4
SLC35F5	KIAA0753
FUT10	ELF4
C5AR1	NOTCH2
SPOPL	CD93
MXD1	FKBP5
UBL3	ECHDC3
PARP8	HERC3
ARL3	FBXL5
NXPE3	ITGB2
ELMO1	IL10RB
BHLHE40	ALPK1
RAB27A	GPR160
RNF167	THEMIS2
MOB3A	SLC11A1
LINGO4	RALB
TLR8	ST6GALNAC3
ELMO2	PPP4R1
ARSG	UPF1
SPAG9	FHIP2A
PLCG2	AVL9
AFMID	TRIM24
PRKAR1A	ADGRE5
CLP1	XPO6
CASP2	CHMP2A
SLCO2B1	CXCR1
ICAM3	GOLGB1
SIRPD	TMEM38A
FSHR	MSRB2
KIF5B	SLC49A4
CASP3	LRFN1
MICU1	TIAM2
KDM4D	ZNF763
CD244	KLF5
TLE4	TRMO
CD47	ELMO1
RTF2	TRIOBP
TNPO3	RBM5
ZNF587	CDK7
EGLN1	SYF2
CWC22	PTPN6
LRRFIP1	NABP1
SLC16A4	RASGRP4
IST1	NADK
NFAT5	KBTBD2
RAB2A	CYBC1
FPR1	STAM2
MIER1	PTPRJ
CRIPT	FPR2
SNX27	PREX1
TVP23C	ZBTB7B
TPPP2	NFKBIA
PCYT1A	S100A12
STK10	AMPD2
ATP2A2	ACTN1
GRN	NRBF2
P4HA1	SCAP
SUPT20H	ZNF486
RNF24	SMAP2
RBM5	CALCOCO1
GPATCH8	ZNF776
PPP2CA	NDEL1
PHF20	ALPL
ACOX1	MAST3
KAT6A	CASS4
TASOR	B3GNT5
PTEN	RNF122
WDR35	RAP1A
NECTIN2	MTM1
AP3S2	NLRC4
PTPN6	KCNE1
CTNNA1	SLC37A3
RP2	IRF1
MYO1F	PTPRE
CLASP1	CKLF-CMTM1
FOXN2	CHSY1
OR13J1	PTPN12
SLC35A1	ABHD4
TDP2	RAC2
STRN	YIPF4
APBB1IP	TAGLN2
KAT7	HSPBAP1
ATP11B	SLC15A4
TXNIP	NCF2
MBOAT1	SH3GLB1
ZWILCH	SOS2
SNX6	FGD4
RIC1	ETS2
BCAS3	HAL
ELF2	SNX10
ARCN1	MCEMP1
ZNF207	LRRC25
CCL4L2	ASPH
LSP1	LSMEM1
DNAJC13	PLEKHG3
ABHD2	VIM
ZEB1	EGLN1
GLB1	HSPA6
PRKAA1	PHC2
C21orf140	LIN7A
AGO3	APAF1
LDHA	DUSP1
USO1	MTARC1
TM9SF3	TSNAX
SLC9A8	CCNJL
GLIPR1	STAT6
OXSR1	QPCT
LILRB2	SIRPD
CHST11	OSGIN2
TMLHE	CRISP3
DOCK2	MVP
NCOA1	ISY1
SORD	CNEP1R1
ARHGAP25	NEK11
ZNF595	TBL1X
RB1	CMTM2
IDI1	LY75-CD302
MAP3K20	EAPP
ST8SIA4	IL1R2
FAM172A	RAB3D
SEPTIN8	MUL1
ANKRD50	CYP27A1
SLC6A6	PDZD8
AGO4	IGF1R
SYTL3	FAR1
LRRK2	DGAT2
ACAP2	RNASEL
ACTR1A	CAMK1D
BCAP31	MLF2
CD55	SUPT20H
ACAD8	CLEC12A
MYH9	MSRA
AKAP13	TLR4
NCKAP1L	ANKRD12
DHCR24	ZNF587
XAGE2	DOCK5
NOMO2	DNAJB5
DPF2	SYNJ1
ACTR2	JAK1
ZBTB47	FLOT1
ARHGDIB	MMP25
GNAI2	SLC35E3
RAF1	RPGR
CD63	CAMKK2
CEMIP2	UBR2
PGLYRP4	MAK
KMT5B	GKAP1
MEF2A	CACNA2D4
DGLUCY	YTHDC1
KRAS	TNFSF14
B3GNT2	AOAH
SERPINA1	CRISPLD2
SIGLEC10	DDX3X
NEMF	EPB41L5
PALLD	E2F3
RAP1A	TDP2
ITGAL	PISD
CDC42SE1	GPAT3
PGAM1	KBTBD7
CCDC96	CEACAM3
SELPLG	KRT23
TXNDC12	S100A9
CNN2	KCNJ2
PITPNB	KLHL2
RLF	PELI2
PARP4	C1RL
YIPF4	LILRB2
SCPEP1	TMCC3
PRDM1	PPP3CA
JPT1	SPATA1
	ADGRE3
	MKNK1
	BMT2
	DYSF
	SORT1
	MCU
	ZZEF1
	KCNE3
	LRRK2
	APOBEC3B
	COP1
	FAM126B
	ECE1
	HCK
	EEPD1
	SNX13
	XRCC4
	SPAG9
	IL13RA1
	STK3
	REPS2
	ANO10
	FCGR3A
	THAP5
	IMPA2
	PRKDC
	CHMP3
	IRS2
	GNG2
	HCG27
	BCL6
	POR
	SLC31A2
	MCTP2
	TIMP1
	TSPAN14
	LILRA5
	TREML2
	EPHB1
	CWC25
	BCL2A1
	ZNF33B
	CD14
	KDM5B
	CLEC4D
	SLC2A14
	CCDC125
	NAMPT
	ZNF430
	TACC3
	DMXL2
	ATG2A
	CYP4F2
	CSGALNACT1
	SLC22A15
	CCPG1
	BOD1L1
	ARFIP1
	MGST2
	ARMH2
	FCGR3B
	CYTIP
	ARSG
	ARPC1B
	CEP19
	IL17RA
	GALNT14
	ERLIN1
	ST3GAL4
	RAB11FIP1
	STX10
	ZNF106
	PTTG2
	FFAR2
	RAPGEF2
	ENTPD1
	ZNF438
	NLRP1
	RPS6KA1
	ADAM17
	CFLAR
	WDR48
	MXD1
	SEMA4A
	NUAK2
	MANSC1
	ELAPOR1
	IL1B
	CDKL5
	NSUN7
	BMX
	FUT7
	YARS1
	TLR2
	B4GALT5
	IL18R1
	VNN2
	CDA
	FBXL13
	RUBCNL
	MYADM
	PGK1
	MGAM2
	RASSF3
	PACSIN2
	ZBTB34
	SSH2
	ALOX5
	TAF7
	BASP1
	TBK1
	SLC44A2
	BIN3
	MAN2A2
	SLC26A8
	LPGAT1
	LINC00173
	HLA-E
	MYH9
	SPOPL
	APMAP
	TSC22D3
	ITSN2
	RHOA
	DNAJC3
	LITAF
	CARD6
	VPS39
	RAF1
	LYST
	INKA2
	ZNF281
	SIRPB1
	BEST1
	PRKAR1A
	STXBP5
	ARG1
	PSENEN
	IRAK3
	PNPLA1
	FAM53C
	GABARAPL1
	GBA
	UBXN2B
	CIR1
	KAT6A
	RAB36
	RAB31
	TBX15
	CEP43
	PUS10
	EFHC2
	CLTC
	NFAM1
	LTB4R
	CREB5
	ACSS2
	KATNBL1
	RILPL2
	TMEM45B
	DENND5A
	RMI1
	PPP1R12B
	VCPKMT
	ARHGAP9
	NPEPPS
	PLXDC2
	SPTLC2
	IFNK
	NIN
	MCM9
	JUNB
	CNTNAP3
	TPK1
	PPIF
	CSAD
	MTHFS
	RBM47
	H4C15
	ELF2
	AP3S1
	PADI2
	JMJD1C
	ACP3
	NMI
	PLPPR2
	PTAFR
	NT5C2
	QSOX1
	SLC9A8
	LPCAT3
	F11R
	TXN
	ATP6V1D
	RTF2
	KCNJ15
	CXCL16
	NPL
	SULT1B1
	FCHO2
	SEMA3C
	HCLS1
	MMP9
	CTSC

## Sheet: down-regulated
DEGs	Modules	Common genes
NRIP3	H2BC21	PRDM11
OR8B3	COX8A	TAAR3P
STMN1	MRTO4	BLMH
ZNF667	ALG9	H4C13
ZSWIM2	CDC45	CCDC113
SHISAL2A	C15orf39	MORN5
PSG3	FAM9A	SLC18B1
ZIC4	PELI1
RPLP2	PRDM11
C1QTNF7	TAAR3P
FZD9	LATS1
OR7A10	SLC18B1
NOS3	NTAN1
FBXL16	CSTA
TAS2R8	CCDC113
PLXNA4	NOP10
AQP11	GLOD4
CERS3	MORN5
FAM241A	AOC2
UBQLNL	AIDA
IZUMO1	H1-6
CGA	DICER1
CHD5	IKZF2
PPP1R17	MAP7D3
RDH10-AS1	CISH
POU3F4	ANO6
GSTM3	BTG2
DIXDC1	LINC02487
PSMG4	IL15RA
MAPK15	BLMH
PXMP4	MECOM
SLC18B1	ADGRL2
GRID2IP	MAP4K5
RYR3	PIP4P2
FKBP6	FNBP1L
MPZ	H4C13
QSOX2	R3HDM1
DEFB130A	EPHB4
DPPA3	KLF8
EPM2A	TMEM245
C1QTNF9B	DNAJC28
MORN5	PA2G4
BLMH
IRS4
ASAP2
LINC00934
HSBP1L1
TCEAL1
CBR1
TAAR3P
NPAS2
ALAD
CBR3
HTRA1
RPS5
RNLS
FKBP4
GPX4
DYNLT5
TCF3
PRDM11
CDKL2
KCND2
ARMH4
SAMD5
SCIN
PKIG
FAM83B
ANKRD31
UBASH3A
ADH7
C3orf18
TOP1MT
CCDC113
PTK6
CD8A
CLDN1
ENTR1
TMOD2
NXF5
GSC
MMP16
RAB15
AKAP6
NRP2
BCL11A
DYRK4
PLCXD3
LAMC1
TCL1A
TMEM123
CD8B
SPTSSB
CST1
MRO
MAL
SLC16A10
SUSD4
H4C13
VSTM2A
PRM2
AXIN2
COCH
RPL13
RPL37
SERHL
GARIN3
NEXMIF
PLCL1
ATP1B2
RCAN3
RPL29
CATSPER2
NUP62CL
H3C6
CAMK4
FLACC1
MYO1B
HMMR
BOLA3
CCR7
OR2L8
IFT46
C12orf57
CXCR5
PPDPFL
FAM102A
TCF7
RPGRIP1
CAV2
UNC80
NSG1
PLAG1
MAGEC3
ID3
CARMIL1
DNAJB13
C5
PTPRO
TRABD2A
NOG
ABLIM1
LEF1
HLA-DPA1
BEX2
DSC1
IFI27
THAP2
CCL2
SPRY1
PPIL6
BACH2
JAM2
LRRN3
POLE2
HLA-DOA
RGCC
AKR1E2
NT5E
NELL2
RAP1GAP
